# Supplementary material for: A hydrolytically stable uranyl organic framework for highly sensitive and selective detection of Fe3+ in aqueous media
Source: Royal Society of Chemistry journal article supplement (doi:10.1039/c7dt04365a), 2017-11-28
Supplement: c7dt04365a1.pdf [file c7dt04365a1.pdf]

## Supporting information

### **A Hydrolytically Stable Uranyl-Organic Framework for Highly Sensitive and Selective Detection of Fe<sup>3+</sup> in Aqueous Media**

**Wei Liu, Jian Xie, Linmeng Zhang, Mark A. Silver and Shuao Wang\***

School for Radiological and Interdisciplinary Sciences (RAD-X) and Collaborative Innovation Center of Radiation Medicine of Jiangsu Higher Education Institutions, Soochow University, 199 Ren'ai Road, Suzhou 215123, China

*KEYWORDS: Uranium; Luminescence; Metal organic framework; Detection*

## S1. Experimental section

## S2. X-ray crystallography

### S3. The TGA curve for compound 1

[illegible][illegible][illegible]

## !

[illegible][illegible]

*Elemental analysis results:* compound **1**, calculated C, 24.05 %; N, 5.34 %; H, 2.08 %; found C 24.03%; N, 5.27%; H, 1.92%. compound **1'**, C, 19.00 %; N, 3.05 %; H, 1.69 %

*X-ray Crystallography Studies:* Single crystal X-ray diffraction data collection was accomplished on a Bruker D8-Venture diffractometer with a Turbo X-ray Source (Mo–K $\alpha$  radiation,  $\lambda = 0.71073$  Å) adopting the direct-drive rotating anode technique and a CMOS detector at 273 K. The data collection was carried out using the program APEX3 and processed using SAINT routine in APEX3. The structure of **1** was solved by direct methods and refined by the full-matrix least squares on  $F^2$  using the SHELXTL-2014 program. All non-hydrogen atoms were refined with anisotropic displacement parameters. Hydrogen atoms attached to carbon atoms were placed in geometrically idealized positions. Crystallographic data of **1** are summarized in **Table S1** and **S2**.

*Hydrolytic Stability Measurements:* The hydrolytic stability of compound **1** was checked by PXRD pattern ahead of investigations of iron detection in different aqueous media. 30 mg of **1** was dispersed into aqueous solutions with various pH values (2-12), 200 ppm of multiple types of metal salt solutions, before PXRD analysis.

*Fe<sup>3+</sup> Concentration Dependent Luminescence Spectra:* 3 mg of compound **1** was dispersed into 2 mL of FeCl<sub>3</sub> aqueous solution with the concentration varying from 0 to 60 ppm. The mixture was then treated with ultrasonic to form a homogeneous suspension, then aged for 1 hour. The Luminescence spectra of suspensions were collected after another 1.5 min ultrasonic treatment. All spectra were collected for three times and the data used for plotting is average value.

*Influence of Competing Cations:* 3 mg of compound **1** was dispersed into 2 mL of 200 ppm M(Cl)<sub>x</sub>·n(H<sub>2</sub>O) (M= Na<sup>+</sup>, Mg<sup>2+</sup>, Co<sup>2+</sup>, Cu<sup>2+</sup>, Cr<sup>3+</sup>, Mn<sup>2+</sup>, Ni<sup>2+</sup>, Sr<sup>2+</sup>, Fe<sup>3+</sup>). The mixture was treated by ultrasonic for 1 min to form a homogeneous suspension. After aging for an hour, luminescence spectra for all samples were collected. 3 mg of

**1** was dispersed into 2 mL deionized water and used as a blank sample following the same procedure. All the spectra were collected for three times to minimize instrumental fluctuation and the data used for plotting is average value.

## S2. Crystallographic Data of compound **1**

**Table S1.** Crystallographic Data and structural refinement for **compound 1**

| Sample                                                         | <b>compound 1</b>                                               |
|----------------------------------------------------------------|-----------------------------------------------------------------|
| Formula                                                        | C <sub>11</sub> H <sub>10</sub> N <sub>2</sub> O <sub>9</sub> U |
| <i>Mr</i> [g·mol <sup>-1</sup> ]                               | 552.24                                                          |
| Crystal system                                                 | Triclinic                                                       |
| Space group                                                    | <i>P</i> $\bar{1}$                                              |
| <i>a</i> (Å)                                                   | 6.5282(6)                                                       |
| <i>b</i> (Å)                                                   | 10.9208(11)                                                     |
| <i>c</i> (Å)                                                   | 10.9233(11)                                                     |
| $\alpha$                                                       | 93.983(4)                                                       |
| $\beta$                                                        | 106.175(4)                                                      |
| $\gamma$                                                       | 103.677(4)                                                      |
| <i>V</i> (Å <sup>3</sup> )                                     | 719.04(12)                                                      |
| <i>Z</i>                                                       | 2                                                               |
| <i>D<sub>c</sub></i> (g cm <sup>-3</sup> )                     | 2.551                                                           |
| $\mu$ (mm <sup>-1</sup> )                                      | 11.339                                                          |
| <i>F</i> (000)                                                 | 508                                                             |
| T(K)                                                           | 296(2)                                                          |
| GOF on <i>F</i> <sup>2</sup>                                   | 1.088                                                           |
| R1, <sup>a</sup> wR2 <sup>b</sup> ( <i>I</i> > 2σ( <i>I</i> )) | 0.0232, 0.0507                                                  |
| R1, <sup>a</sup> wR2 <sup>b</sup> (all data)                   | 0.0266, 0.0517                                                  |

$$^a R_1 = \sum(F_o - F_c)/\sum F_o; wR_2 = [\sum w(F_o^2 - F_c^2)^2/\sum w(F_o^2)^2]^{1/2}$$

!

| Selected Bond Lengths (Å) |          |
|---------------------------|----------|
| U1-O1                     | 1.768(4) |
| U1-O2                     | 1.746(4) |
| U1-O3                     | 2.378(3) |
| U1-O4                     | 2.287(3) |
| U1-O5                     | 2.367(3) |
| U1-O6                     | 2.470(3) |
| U1-O7                     | 2.421(3) |

### S3. The TGA curve for compound 1

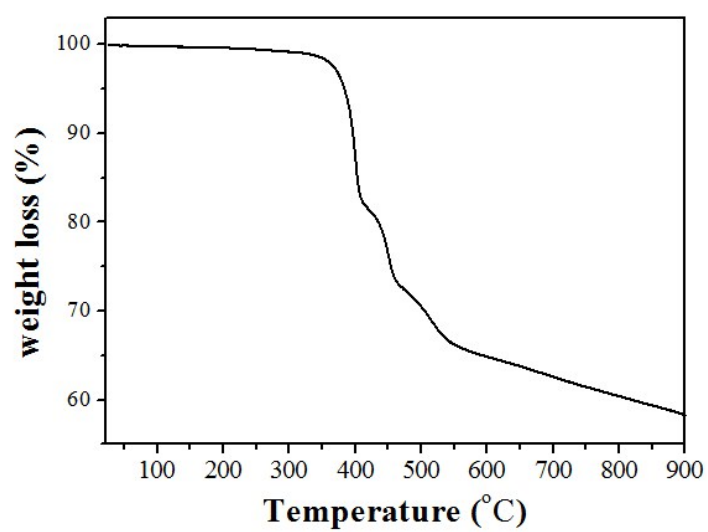



#### S4. EDS analysis

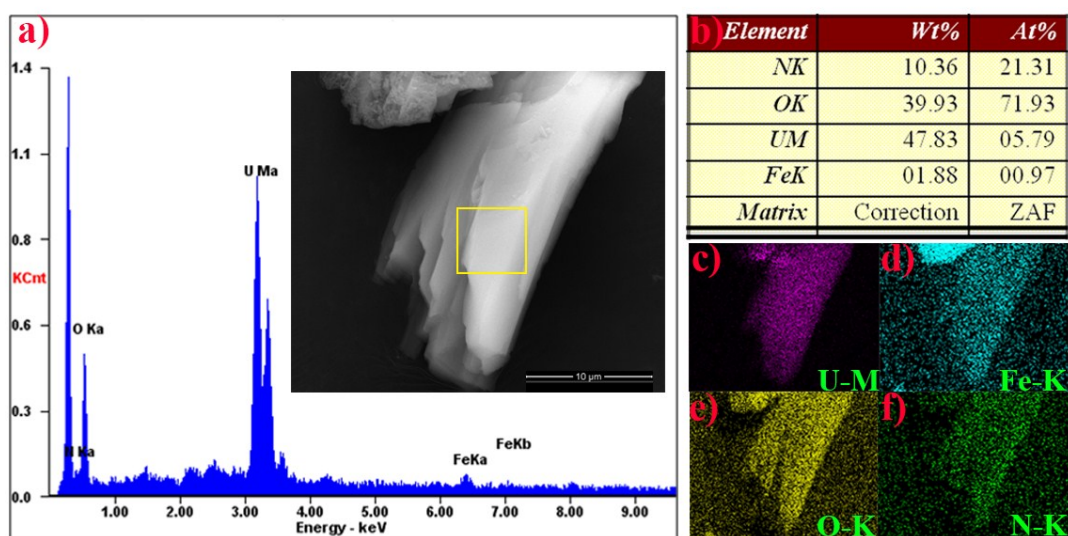

**Figure S3.** a), b) EDS analysis of the Fe loaded sample of **1**, inset is the SEM photograph of a single crystal of **1**. c), d), e), f) U, Fe, O and N elements EDS mapping of a single crystal of **1** showing the elemental distribution on the surface of a crystal of **1**.

#### S5. Determination of the detection limit

Based on the fluorescence measurement shown in Figure 5, the linear domain in low dose range can be fitted as

$$y = 5.22x + 6.23$$

where  $y$  is the relative decrease of luminescence intensity ( $100 \times (I_0 - I)/I_0$ ) monitored at 512 nm, and  $x$  is the  $\text{Fe}^{3+}$  concentration.

The standard deviation ( $\sigma$ ) is defined as  $100 \times (I_{SE}/I_0)$ , where  $I_{SE}$  is the standard error of the emission measurement, as determined by the baseline measurement of blank samples (monitored at 512 nm),  $I_0$  is the luminescence intensity of compound **1** in



deionized water (also monitored at 512 nm). If defining three times of the standard deviation as the detectable signal, the detection limit can be projected as  $3\sigma/\text{slope} = 6.3 \times 10^{-3} \text{ ppm}$

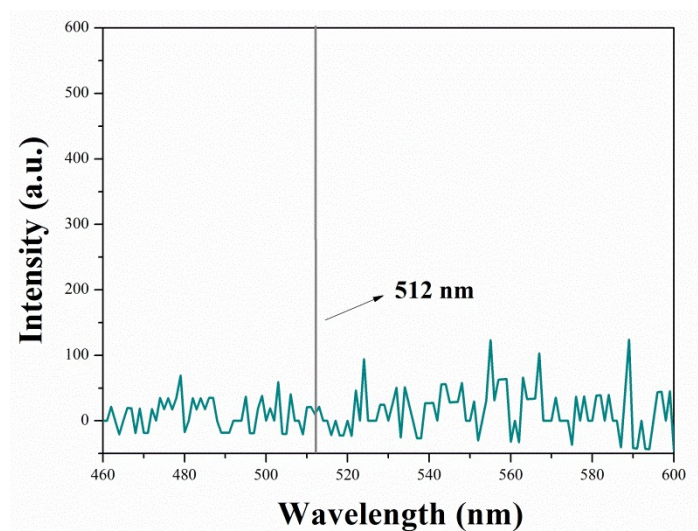

**Figure S4.** Emission spectra of deionized water, (excited at 365 nm,  $I_{SE}$ : deionized water 10.12).

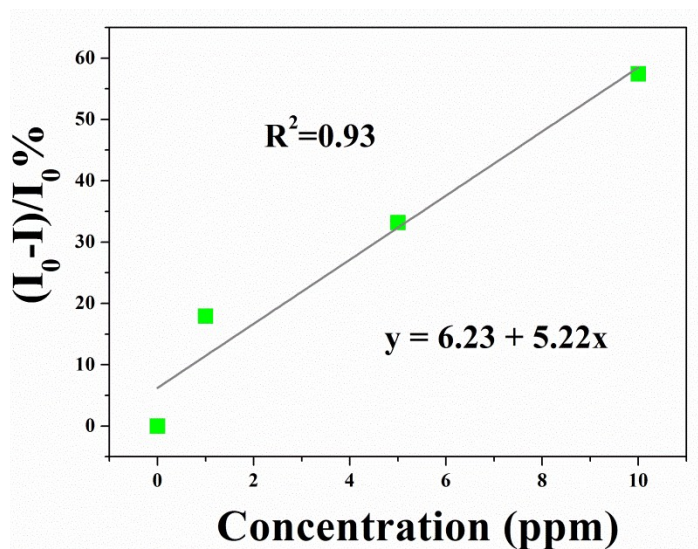

**Figure S5.** The plot showing the quenching ratio of PL intensity (measured at 512 nm) of **compound 1** as a function of the  $\text{Fe}^{3+}$  concentration, the data points in low concentration range from 0 to 10 ppm are fitted in linear relationship to obtain the slop.
